# Supplementary material
Source: PubMed Central journal article supplement (PMC7318040)
Supplement: AAC.00070-20-s0001.pdf [file AAC.00070-20-s0001.pdf]

1 **Supplemental Material**

2 **Title**

3 The Added Value of Longitudinal Imaging for Preclinical *In vivo* Efficacy Testing of  
4 Therapeutic Compounds against Cerebral Cryptococcosis

5 **Authors**

6 Liesbeth Vanherp<sup>1,2</sup>, Jennifer Poelmans<sup>1,2,°</sup>, Amy Hillen<sup>1,2,◇</sup>, Guilhem Janbon<sup>3</sup>, Matthias  
7 Brock<sup>4</sup>, Katrien Lagrou<sup>5,6</sup>, Greetje Vande Velde<sup>1,2,#,\*</sup>, Uwe Himmelreich<sup>1,2,\*</sup>

8 # Address correspondence to Greetje Vande Velde, [greetje.vandavelde@kuleuven.be](mailto:greetje.vandavelde@kuleuven.be)

9 \* G.V.V. and U.H. contributed equally to this work

## 10 **Supplementary methods**

### 11 **Generation of an E2-Crimson expressing *C. neoformans* KN99 $\alpha$ strain**

12 The strategy for generating a codon-optimized E2-Crimson expression construct was  
13 similar to that described for the codon-optimized red-shifted firefly luciferase (1). The  
14 protein sequence of the far-red fluorescent protein E2-Crimson (AMO27221) was used  
15 as a template to generate a codon-optimized gene sequence for expression in *C.*  
16 *neoformans*. The codon usage table and its accompanied di-codon adaptation index  
17 (dCAI) was deduced from a set of 40 highly expressed genes from *C. neoformans* H99  
18 (2). The E2-Crimson protein sequence was then back-translated into a codon-  
19 optimized DNA sequence. To prevent problems of reduced mRNA accumulation from  
20 intron-less gene sequences in *C. neoformans* (3), the coding region was interrupted at  
21 position 120 by a 62 base pair (bp) intron sequence deriving from the *C. neoformans*  
22 glyceraldehyde-3-phosphate dehydrogenase gene. As this intron causes a frame shift  
23 and early termination of translation if not spliced from the transcript, only correctly  
24 processed mRNA results in the production of a functional fluorescent protein. To  
25 regulate gene expression, the synthetic E2-Crimson gene (GenBank accession  
26 number MN242783) was fused by *in vitro* recombination (InFusion HD cloning kit,  
27 Takara/Clontech) with a 1167 bp *EF1 $\alpha$*  promoter and a 402 bp *TRP1* terminator  
28 sequence from *C. neoformans*.

29 The plasmid pNE562 was constructed by cloning the 2317 bp synthetic construct  
30 containing the optimized E2-Crimson encoding gene in the “safe haven” plasmid  
31 pSDMA25 (4) at the *SacI* restriction site. After linearization using the *PacI* restriction  
32 enzyme, the pNE562 plasmid was integrated in the *C. neoformans* KN99 $\alpha$  genome by  
33 biolistic transformation (5). The transformants were selected on nourseothricin  
34 containing medium (200  $\mu$ g/mL). Correct integration at the safe haven site was

35 confirmed by multiplexed PCR using the primers UQ1768, UQ2962, UQ2963 and  
36 UQ3348, as previously described (4).

### 37 **Assessment of fluorescence in E2-Crimson-expressing cells**

38 E2-Crimson expressing *C. neoformans* cells were exposed to the same concentrations  
39 of antifungals described for the BLI experiments, in a black 96-well plate (Nunc®  
40 Microwell, Thermo Fisher Scientific, Merelbeke, Belgium). At 45 min, 3, 5 and 24 hours  
41 after addition of the antifungals, fluorescence was measured using an IVIS Spectrum  
42 imaging system with excitation/emission filters 605/660 nm, 30 sec exposure time,  
43 F/stop 2, medium binning and a subject height of 1 cm. The total radiant efficiency in  
44 a region of interest placed in every well was quantified using Living Image Software  
45 (version 4.5.4).

### 46 **Testing of potential auto-fluorescence and auto-luminescence of antifungals**

47 The background fluorescence and luminescence of the antifungal compounds (0.1  
48 mg/ml), SDS (1%) or an equal volume sterile water was measured in sterile water and  
49 Sabouraud medium as described previously. Luminescence was measured before and  
50 after the addition of D-luciferin.

### 51 **Histology**

52 After a pentobarbital overdose, animals were transcardially perfused with saline and  
53 4% paraformaldehyde (PFA, Sigma-Aldrich, Steinheim, Germany). Isolated brains  
54 were post-fixed overnight in 4% PFA. Paraffin sections (5 µm) were cut along the  
55 coronal axis. Sections were stained with periodic acid–Schiff (PAS) using orthoperiodic  
56 acid (AnalaR NORMAPUR®, VWR Prolabo, Haasrode, Belgium) and Schiff's reagent  
57 (Merck, Darmstadt, Germany). Sections were counterstained with Mayer's hematoxylin  
58 (Sigma-Aldrich Chemie GmbH, Steinheim, Germany). Slides were scanned using a

59 Mirax desk digital slide scanner (Carl Zeiss, Göttingen, Germany) and analyzed using  
60 Panoramic Viewer (version 1.15.4, 3DHISTECH Ltd., Budapest, Hungary).

### 61 **Data availability**

62 The genetic sequence of the synthetic E2-Crimson gene is available via GenBank  
63 under accession number MN242783.

### 64 **References**

- 65 1. Vanherp L, Ristani A, Poelmans J, Hillen A, Lagrou K, Janbon G, Brock M,  
66 Himmelreich U, Vande Velde G. 2019. Sensitive bioluminescence imaging of  
67 fungal dissemination to the brain in mouse models of cryptococcosis. *Dis*  
68 *Model Mech* 12:dmm039123.
- 69 2. Jacobsen ID, Lüttich A, Kurzai O, Hube B, Brock M. 2014. In vivo imaging of  
70 disseminated murine *Candida albicans* infection reveals unexpected host sites  
71 of fungal persistence during antifungal therapy. *J Antimicrob Chemother*  
72 69:2785–2796.
- 73 3. Goebels C, Thonn A, Gonzalez-Hilarion S, Rolland O, Moyrand F, Beilharz TH,  
74 Janbon G. 2013. Introns regulate gene expression in *Cryptococcus*  
75 *neoformans* in a Pab2p dependent pathway. *PLoS Genet* 9:e1003686.
- 76 4. Arras SDM, Chitty JL, Blake KL, Schulz BL, Fraser JA. 2015. A genomic safe  
77 haven for mutant complementation in *Cryptococcus neoformans*. *PLoS One*  
78 10:e0122916.
- 79 5. Toffaletti DL, Rude TH, Johnston SA, Durack DT, Perfect JR. 1993. Gene  
80 transfer in *Cryptococcus neoformans* by use of biolistic delivery of DNA. *J*  
81 *Bacteriol* 175:1405–11.

82 **Supplementary Figures**

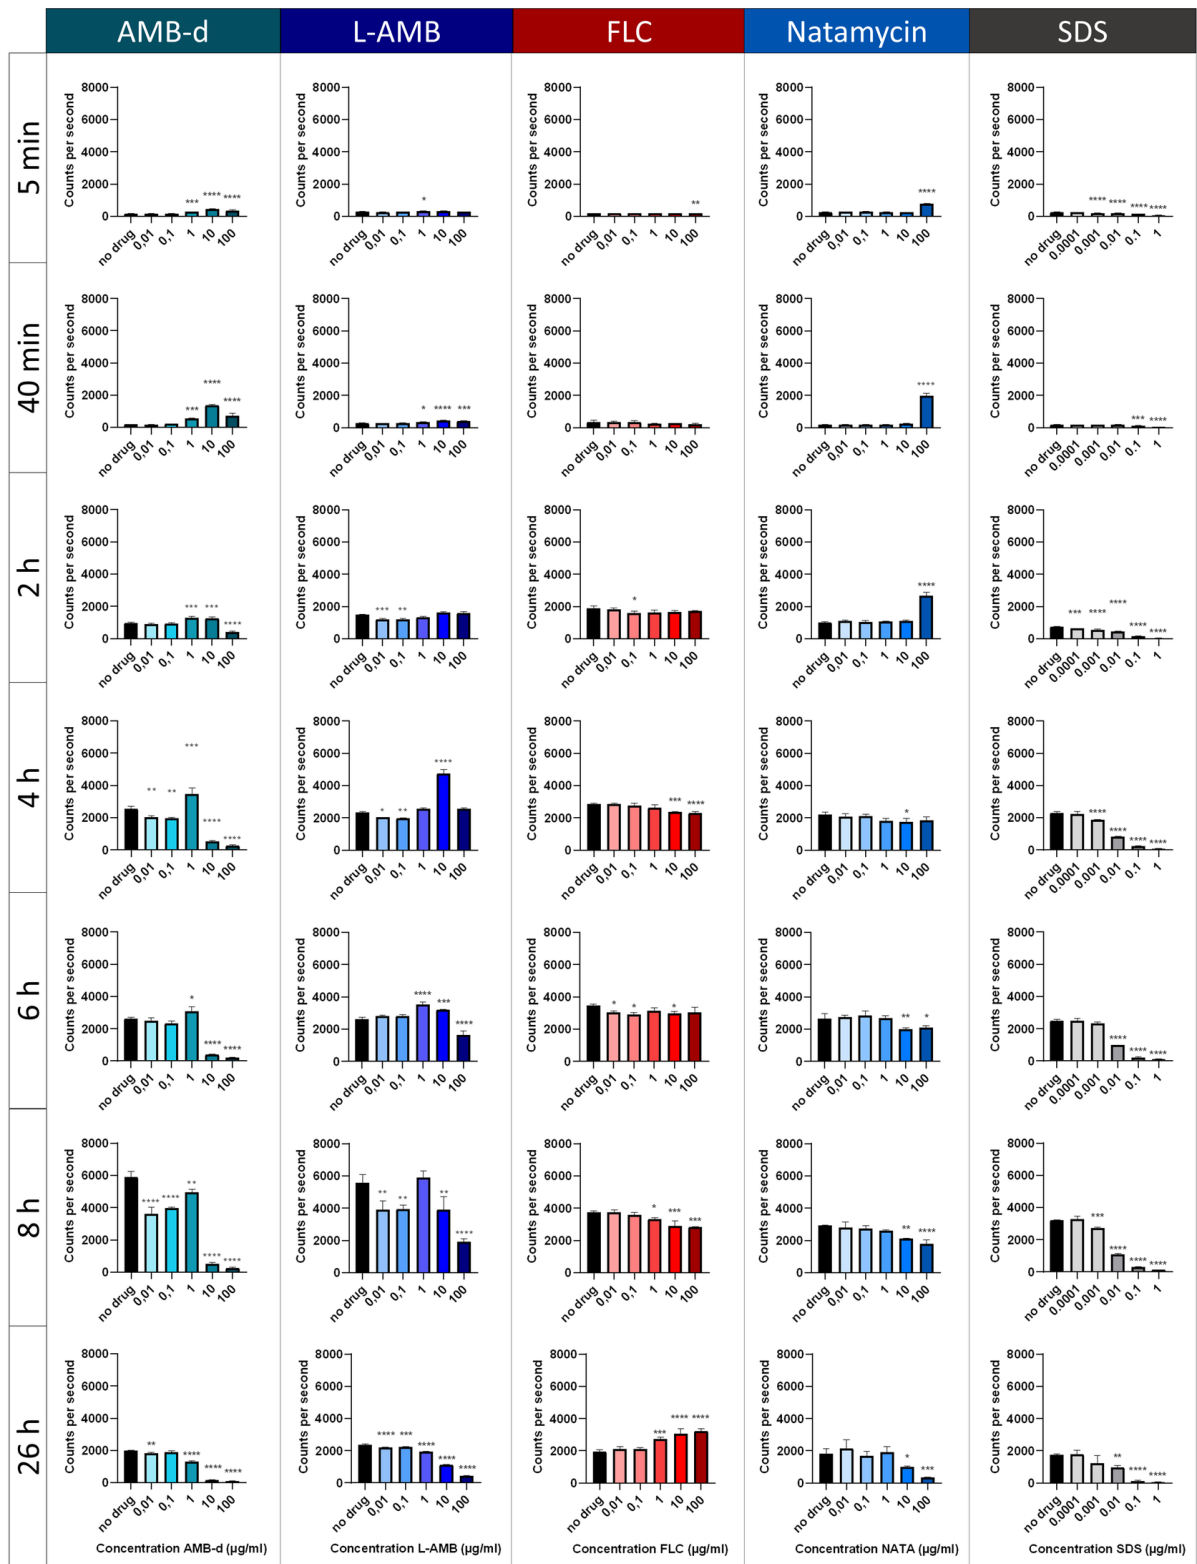

83 **Supplementary Figure S1. *In vitro* bioluminescence assay of antifungal efficacy**  
84 **at specific time points.** Amphotericin B deoxycholate (AMB-d), liposomal  
85 amphotericin B (L-AMB), fluconazole (FLC), natamycin (NATA) or sodium dodecyl  
86 sulphate (SDS) was added to liquid cultures and the BLI signal was measured by  
87 adding D-luciferin to samples of the culture at 5 min, 40 min, 2, 4, 6, 8 and 26 hours.  
88 Graphs show mean + SD, one-way ANOVA with Dunnett's post-test compared to no  
89 drug control. \*:  $p < 0.05$ , \*\*:  $p < 0.01$ , \*\*\*:  $p < 0.001$ , \*\*\*\*:  $p < 0.0001$ .

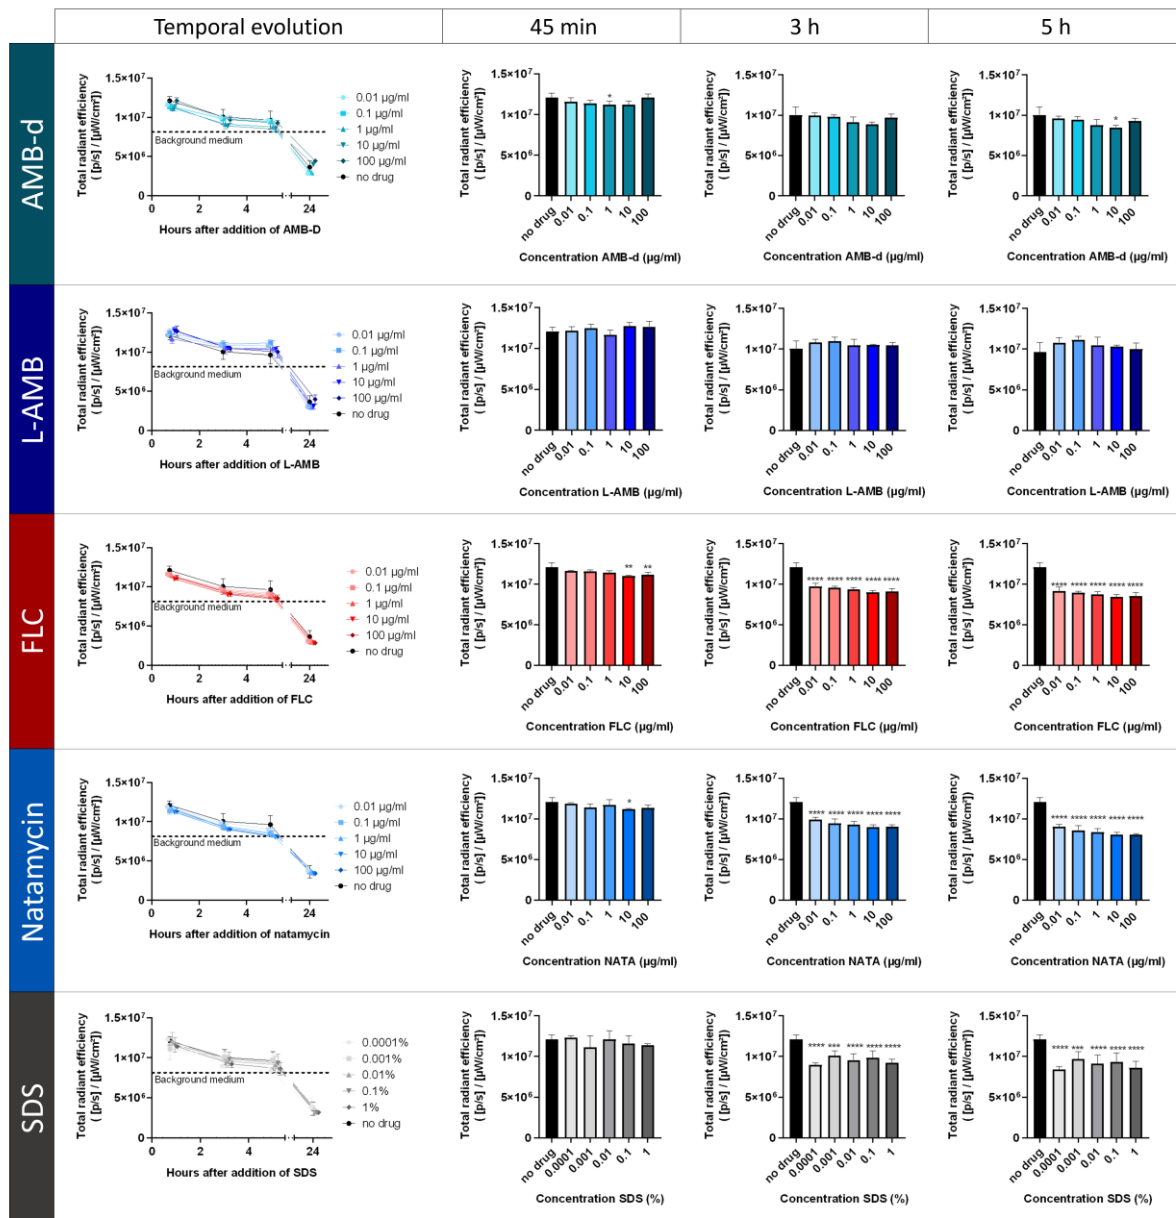

90 **Supplementary Figure S2. Fluorescence-based *in vitro* testing of antifungal**  
 91 **efficacy.** Various concentrations of antifungals were added to *C. neoformans* cells  
 92 expressing fluorescent E2-Crimson in a black 96-well plate. Fluorescence was  
 93 measured at 45 min, 3, 5 and 24 hours after addition. Graphs show the temporal  
 94 evolution in the fluorescence signal and detailed analysis for 45 min, 3 and 5 hours.  
 95 The dashed line represents the background fluorescence obtained from sterile  
 96 Sabouraud medium. Graphs show mean + SD, one-way ANOVA with Dunnett's post-  
 97 test compared to no drug control. \*:  $p < 0.05$ , \*\*:  $p < 0.01$ , \*\*\*:  $p < 0.001$ , \*\*\*\*:  $p < 0.0001$ .

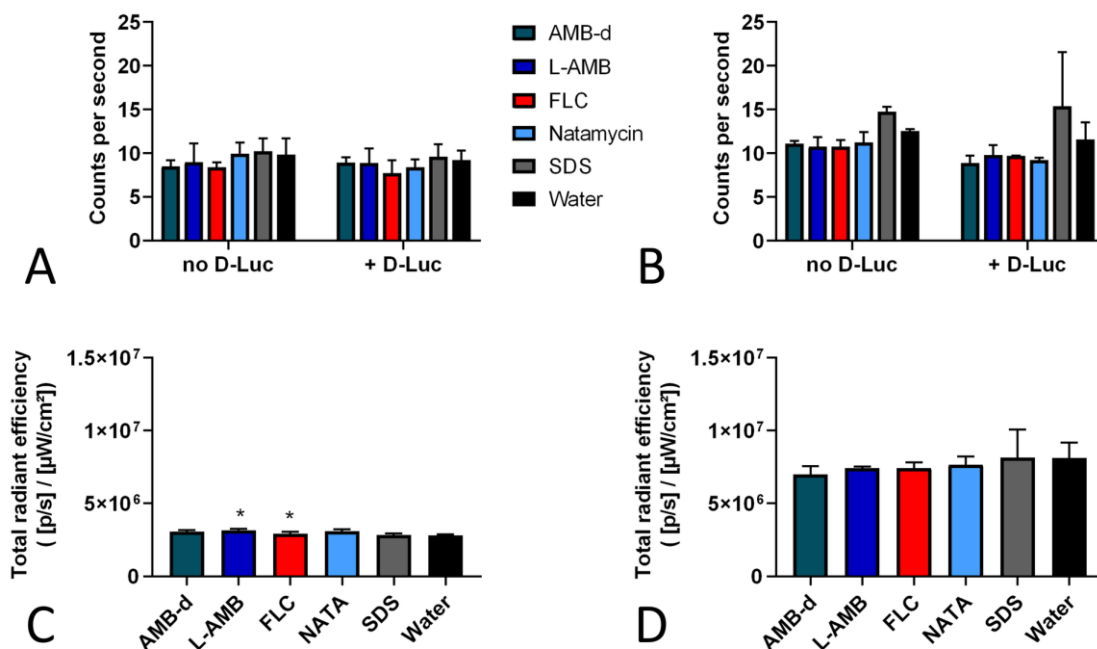

98 **Supplementary Figure S3. Assessment of potential auto-luminescence and auto-**  
 99 **fluorescence of the antifungal compounds.** Liposomal amphotericin B (L-AMB),  
 100 amphotericin B deoxycholate (AMB-d), fluconazole (FLC), natamycin (NATA), or  
 101 sodium dodecyl sulphate (SDS) was added to sterile water or Sabouraud medium (0.1  
 102 mg/ml antifungal or 1% SDS). A, B) In sterile water (A) or Sabouraud medium (B), the  
 103 compounds showed no detectable auto-luminescence, both in absence and presence  
 104 of D-luciferin. C, D) The compounds were not auto-fluorescent in sterile water (C) or  
 105 Sabouraud medium (D). Graphs show mean + SD, one-way (fluorescence) or two-way  
 106 (luminescence) ANOVA with Dunnett's post-test, compared to the control condition  
 107 with sterile water. \*: p<0.05.



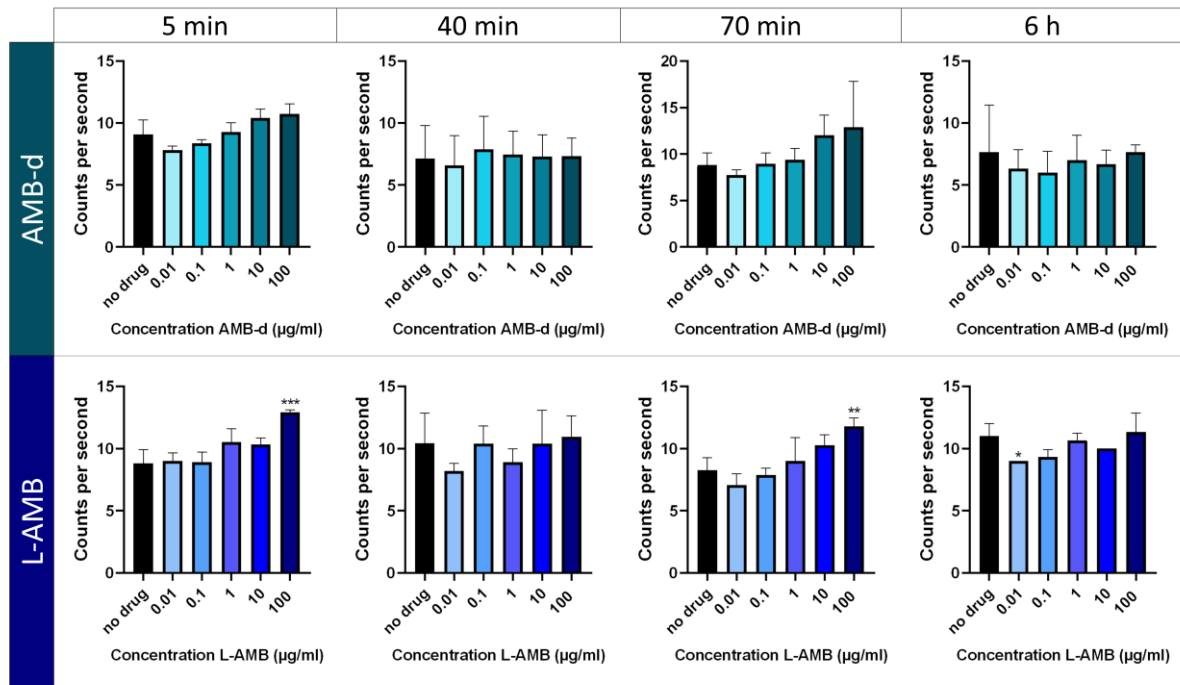

108 **Supplementary Figure S4. Measurement of potential luminescence of wild-type**  
 109 ***C. neoformans* cells exposed to antifungals.** Amphotericin B deoxycholate (AMB-  
 110 d) and liposomal amphotericin B (L-AMB) were added to liquid cultures of wild-type *C.*  
 111 *neoformans* KN99α cells and luminescence was measured after addition of D-luciferin  
 112 to culture samples. Graphs show mean + SD, one-way ANOVA with Dunnett's post-  
 113 test, in comparison to the no drug control. \*:  $p < 0.05$ , \*\*:  $p < 0.01$ , \*\*\*:  $p < 0.001$ .

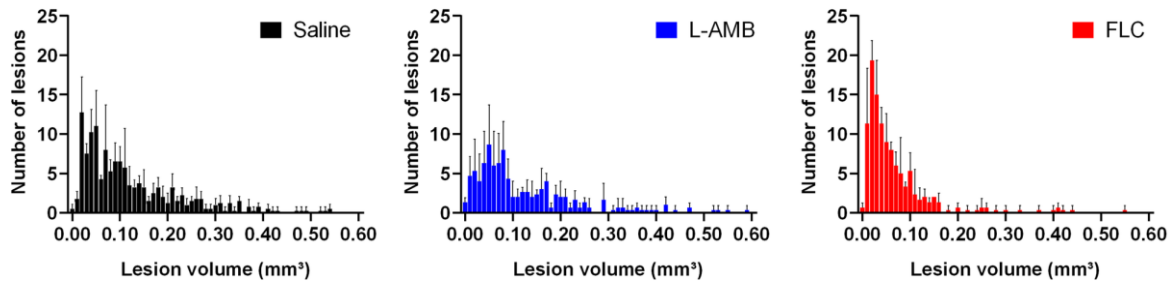

114 **Supplementary Figure S5. Lesion volume distribution after systemic treatment**  
 115 **in the meningoencephalitis model.** After intravenous infection, animals were treated  
 116 with saline, liposomal amphotericin B (L-AMB) or fluconazole (FLC). The volume of the  
 117 individual lesions was quantified based on the 3D MRI scans obtained on day 6 p.i..  
 118 The histograms (bin size 0.01) were averaged for all animals in a treatment group,  
 119 showing mean + SD in every bin.

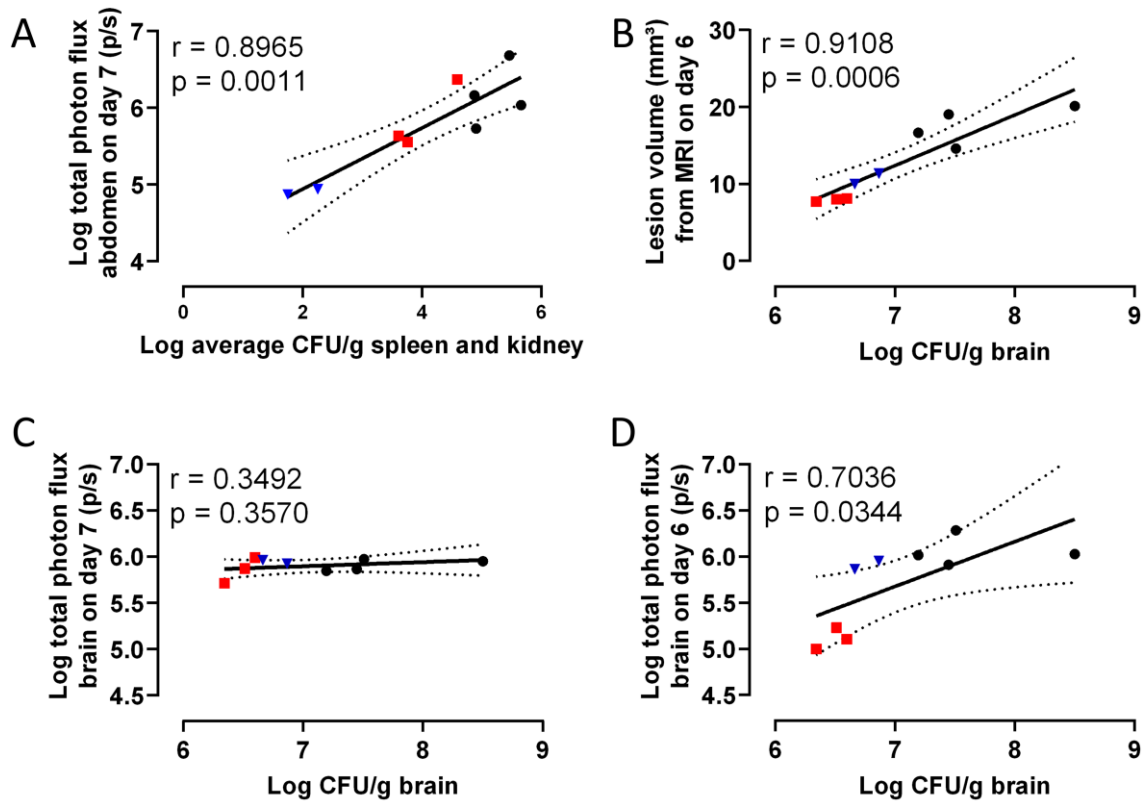

120 **Supplementary Figure S6: Correlation of imaging findings with the fungal**  
 121 **burden in the meningoencephalitis model.** A) *In vivo* BLI results in the abdomen  
 122 were in good correspondence with the average fungal load in the spleen and kidneys.  
 123 B) Lesion volume as quantified from MRI on day 6 showed an excellent correlation to  
 124 brain fungal load. C-D) *In vivo* BLI results on day 7 (C) showed limited variation and  
 125 no correlation, but BLI results obtained on day 6 (D) correlated well with the CFUs in  
 126 the brain (assessed on day 7). Linear regression with 95% confidence band and  
 127 Pearson correlation coefficients. Dots represent individual animals, colors correspond  
 128 to the treatment groups: saline (black), L-AMB (blue), FLC (red).

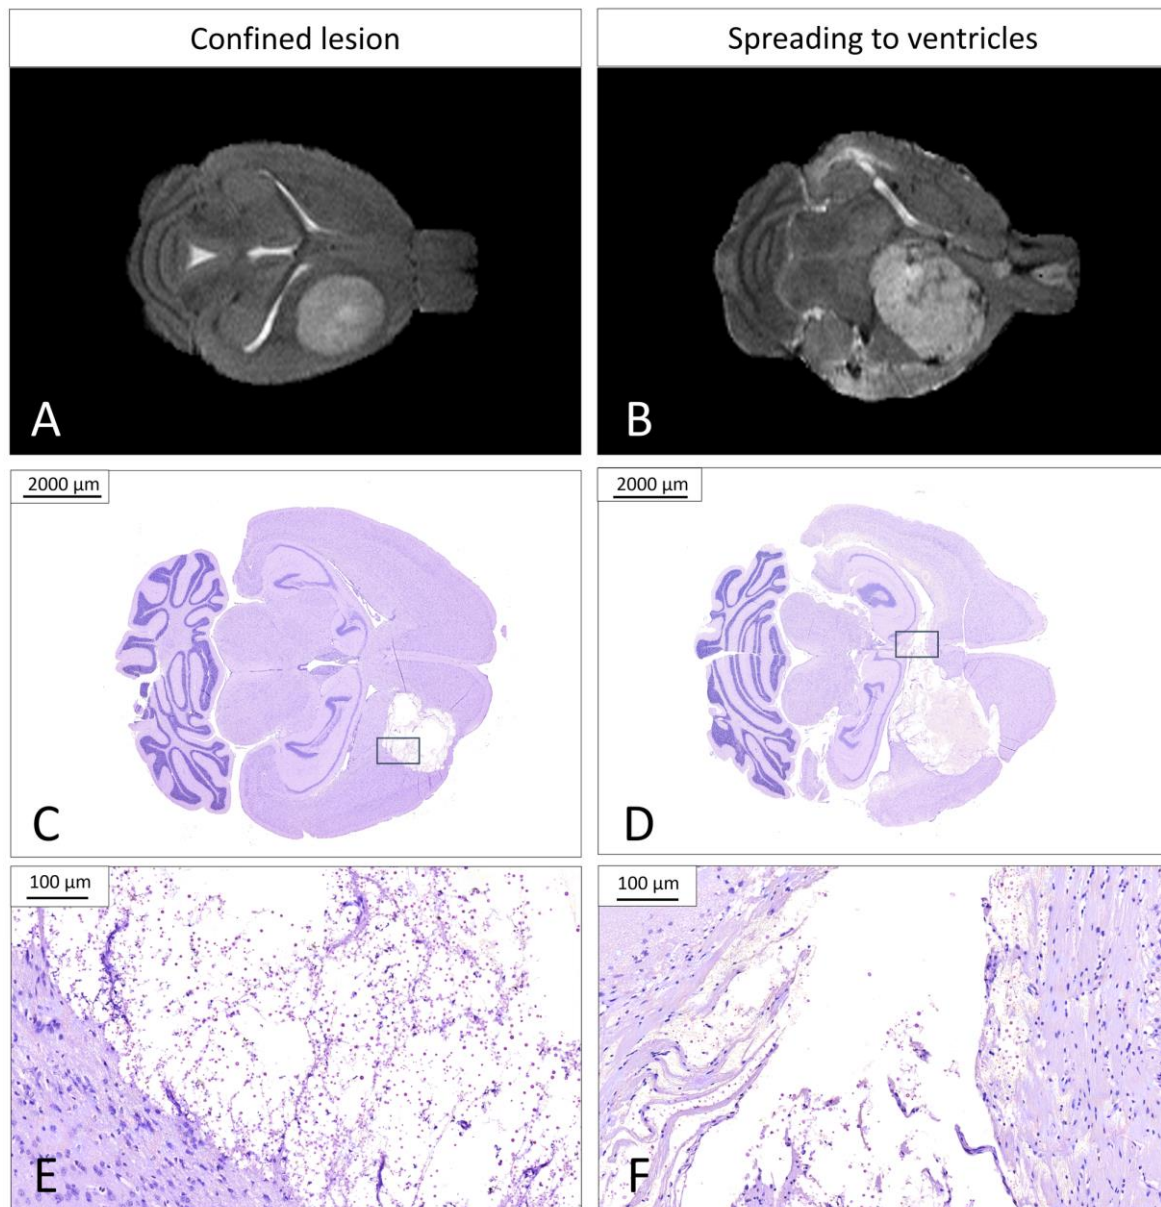

129 **Supplementary Figure S7: Correspondence of *in vivo* MRI with histology of the**  
 130 **brain.** Animals were stereotactically injected with GFP-expressing *C. neoformans* H99,  
 131 scanned using MRI and sacrificed for histology. A-B) T<sub>2</sub>-weighted 2D MR images for a  
 132 confined lesion at day 13 p.i. (A) and a lesion spreading into the ventricles at day 10  
 133 p.i. (B). (C-D) Corresponding periodic acid-Schiff (PAS) staining of the brains of these  
 134 animals. E) Magnification of figure C, showing the presence of numerous cryptococci  
 135 in the cryptococcoma. F) Magnification of figure D, showing the spreading of fungal  
 136 cells from the cryptococcoma into the ventricle.

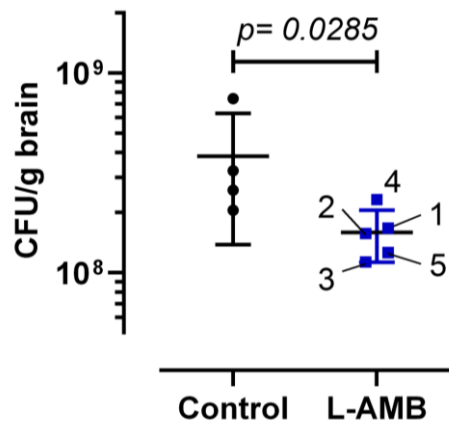

137 **Supplementary Figure S8: CFU counting after intracerebral treatment in the**  
 138 **cryptococcoma model.** Brains were isolated and homogenized after the last imaging  
 139 session or when animals were sacrificed for humane endpoints (n = 4 (controls) or 5  
 140 (L-AMB treated animals)). There was a small but significant reduction of the fungal  
 141 load in animals receiving intracerebral injection with liposomal amphotericin B (L-AMB,  
 142 2.5  $\mu$ l of 0.6 mg/ml). Graphs show individual mice and mean  $\pm$  SD, unpaired t-test.  
 143 Numbers correspond to the individual animals in Fig. 9.
